# Supplementary material for: Enhancing the thermal stability of the NIR emitting A2InCl5·H2O:Cr3+ phosphor based on A site regulation
Source: Royal Society of Chemistry journal article supplement (doi:10.1039/d4tc02299h), 2024-01-01
Supplement: d4tc02299h1.pdf [file d4tc02299h1.pdf]

## Electronic supplementary information

# The enhanced thermal stability for NIR emission $A_2InCl_5 \cdot H_2O:Cr^{3+}$ phosphor based on A site regulation

Lingkang Yu,<sup>a,b</sup> Yining Wang,<sup>a,b</sup> Xiaole Xing,<sup>a,b</sup> Zheng Xu,<sup>a,b</sup> Mengmeng Shang,<sup>\*a,b</sup>

<sup>a</sup>Key Laboratory for Liquid-Solid Structural Evolution and Processing of Materials (Ministry of Education), School of Material Science and Engineering, Shandong University, Jinan 250061, P. R. China

<sup>b</sup>Shenzhen Research Institute of Shandong University, Shandong University, Shenzhen 518063, P. R. China

\*Email: mmshang@sdu.edu.cn

## Experimental section

### Materials.

Cesium chloride (CsCl, Aladdin, 99.99%), Indium oxide ( $\text{In}_2\text{O}_3$ , Jining Tianyi New Materials Co.,Ltd, 99.99%), Chromium chloride ( $\text{CrCl}_3$ , Aladdin, 99.99%), Potassium carbonate ( $\text{K}_2\text{CO}_3$ , Sinopharm Chemical Reagent Co., Ltd, analytical pure), Rubidium carbonate ( $\text{Rb}_2\text{CO}_3$ , Aladdin, 99.8%), Sodium chloride (NaCl, Aladdin, 99.99%), Hydrochloric acid and ethanol were purchased from Sinopharm Chemical Reagent Co., Ltd. All materials were used without further purification.

### Synthesis of $\text{Cs}_2\text{InCl}_5\cdot\text{H}_2\text{O}:\text{xCr}^{3+}$ powder.

$\text{Cr}^{3+}$  doped  $\text{Cs}_2\text{InCl}_5\cdot\text{H}_2\text{O}$  crystal powders were prepared following a hydrothermal method. In detail, 2 mmol CsCl, x mmol  $\text{CrCl}_3$  and  $(1-x)/2$  mmol  $\text{In}_2\text{O}_3$  were dissolved with 10 ml HCl in a 25 ml Teflon autoclave (x was set as 0, 0.05, 0.10, 0.15, 0.20, 0.25, 0.30, respectively). The solution was heated at 160 °C for 6 h, then slowly cooled to room temperature. The as-synthesized crystal powders were then filtered out and washed 2~3 times with ethanol, and finally dried in a furnace at 60 °C for overnight.

### Synthesis of $(\text{Cs}_{1-y}\text{Rb}_y)_2\text{InCl}_5\cdot\text{H}_2\text{O}:0.25\text{Cr}^{3+}$ powder.

0.25 mmol  $\text{CrCl}_3$ , 0.375 mmol  $\text{In}_2\text{O}_3$ , y mmol  $\text{Rb}_2\text{CO}_3$  and  $(2-2y)$  mmol CsCl were dissolved with 10ml HCl in a 25ml Teflon autoclave (y was set as 0, 0.2, 0.4, 0.6, 0.8, 1.0, respectively). The solution was heated at 160 °C for 6 h, then slowly cooled to room temperature. The as-synthesized crystals were then filtered out and washed with ethanol 2~3 times, and finally dried in a furnace at 60 °C for overnight.

### Synthesis of $(\text{Cs}_{1-z}\text{K}_z)_2\text{InCl}_5\cdot\text{H}_2\text{O}:0.25\text{Cr}^{3+}$ powder.

$(\text{Cs}_{1-z}\text{K}_z)_2\text{InCl}_5\cdot\text{H}_2\text{O}:0.25\text{Cr}^{3+}$  crystals were prepared with the similar procedures to that of  $(\text{Cs}_{1-y}\text{Rb}_y)_2\text{InCl}_5\cdot\text{H}_2\text{O}:0.25\text{Cr}^{3+}$  crystals above, except z was set as 0, 0.1, 0.2, 0.3, 0.4, 0.5, respectively.

### Characterization.

The diffuse reflection spectra (DRS) were recorded on an UV–vis–NIR spectrophotometer (UV-3600 plus, Shimadzu, Japan). The composition and phase of materials were detected by powder X-ray diffraction (XRD) measurements using a D8 Focus diffractometer (Bruker) with Cu K $\alpha$  radiation ( $\lambda = 0.15405$  nm). The General Structure Analysis System II (GSAS II) program was used to conduct XRD refinements. The morphology and elemental composition were obtained by a field-emission scanning electron microscope (SU-70, Hitachi) equipped with an energy-dispersive spectrometer. The steady-state photoluminescence (PL) and photoluminescence excitation (PLE) spectra, the decay curves, temperature-dependent PL spectra (77-425K) and PLQYs were recorded via an Edinburgh fluorescence spectrometer (FLS 980) equipped with a continuous 450 W xenon lamp as the steady-state excitation sources, a pulsed high-energy Xenon flash lamp ( $\mu\text{F}_2$ ) as the transient excitation source, and an integrating sphere. The thermogravimetric (TG) tests were detected by a thermogravimetric analyzer (TGA8000, PerkinElmer). The differential scanning calorimetry (DSC) curves were detected by Differential Scanning Calorimeter (DSC8000 PerkinElmer). The quantum efficiency for NIR emission of the as-prepared phosphors was recorded by vis–NIR absolute quantum efficiency test system (Hamamatsu C9920-02) equipped with 3.3-inch integrating sphere. In order to evaluate the Debye temperature of  $\text{Cs}_2\text{InCl}_5\cdot\text{H}_2\text{O}:0.25\text{Cr}^{3+}$ ,  $(\text{Cs}_{0.6}\text{Rb}_{0.4})_2\text{InCl}_5\cdot\text{H}_2\text{O}:0.25\text{Cr}^{3+}$  and  $(\text{Cs}_{0.7}\text{K}_{0.3})_2\text{InCl}_5\cdot\text{H}_2\text{O}:0.25\text{Cr}^{3+}$ , DFT method was used. The generalized gradient approximation with the Perdew-Burke-Ernzerhof functional was used as the exchange correlation potential. All calculations were performed using a 650 eV cut-off energy. In the Brillouin zone, a  $2 \times 3 \times 4$  k-mesh grid centered on gamma was used, and the self-consistent charge density was determined by the Monkhorst-Pack scheme. The lattice was completely relaxed until the atomic force was  $< -0.02$  eV  $\text{\AA}^{-1}$ .

Debye temperature ( $\Theta_{D,i}$ ) was calculated according to the anisotropic atomic displacement parameter, using the following formula:

$$\Theta_{D,i} = \sqrt{\frac{3\hbar TN_A}{A_i k_B U_{iso,i}}} \quad (eq.S1)$$

The formula incorporates the atomic weight of the atom ( $A_i$ ), reduced Planck's constant ( $\hbar$ ), Boltzmann's constant ( $k_B$ ), the average atomic displacement parameter ( $U_{iso,i}$ ). The  $\Theta_{D,i}$  value is inversely proportional to  $U_{iso,i}$ .

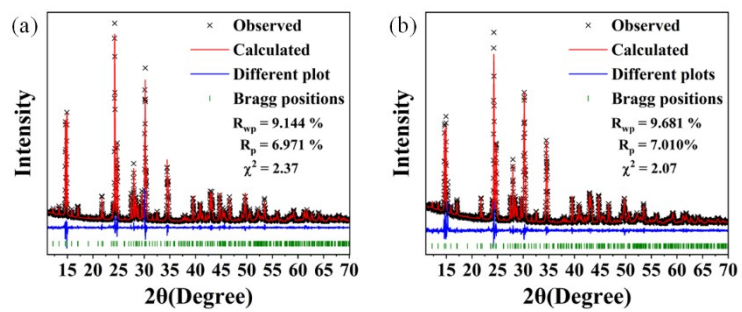

Fig. S1.a b) XRD Rietveld refinement of  $\text{Cs}_2\text{InCl}_5 \cdot \text{H}_2\text{O}$  matrix and  $\text{Cs}_2\text{InCl}_5 \cdot \text{H}_2\text{O} : 0.25\text{Cr}^{3+}$ .

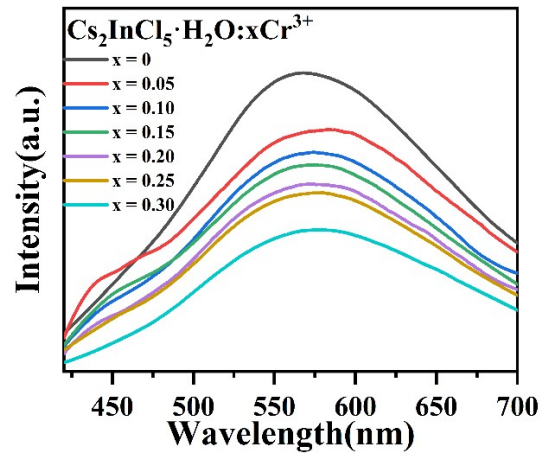

Fig.S2. PL spectra for the  $\text{Cs}_2\text{InCl}_5 \cdot \text{H}_2\text{O} : x\text{Cr}^{3+}$  ( $x = 0 \sim 0.30$ ) phosphors at 360 nm excitation wavelength.

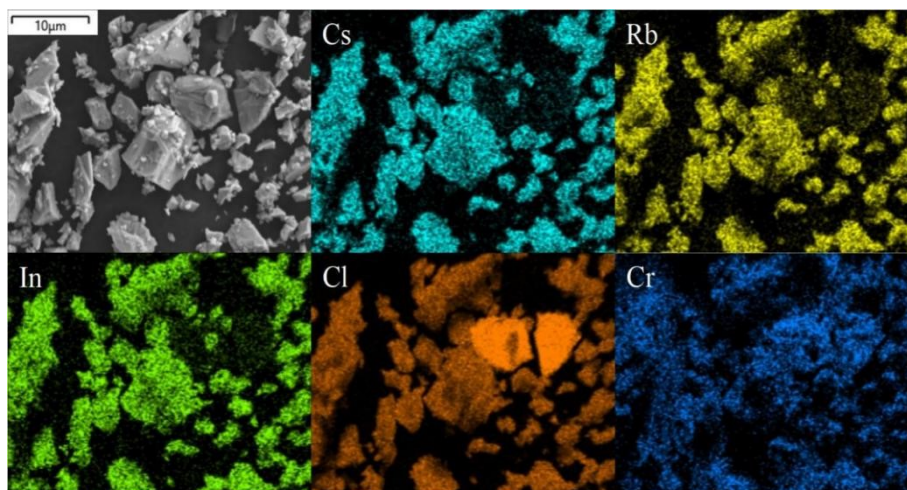

Fig. S3. SEM image and elemental mapping images of  $(\text{Cs}_{0.6}\text{Rb}_{0.4})_2\text{InCl}_5 \cdot \text{H}_2\text{O} : 0.25\text{Cr}^{3+}$ .

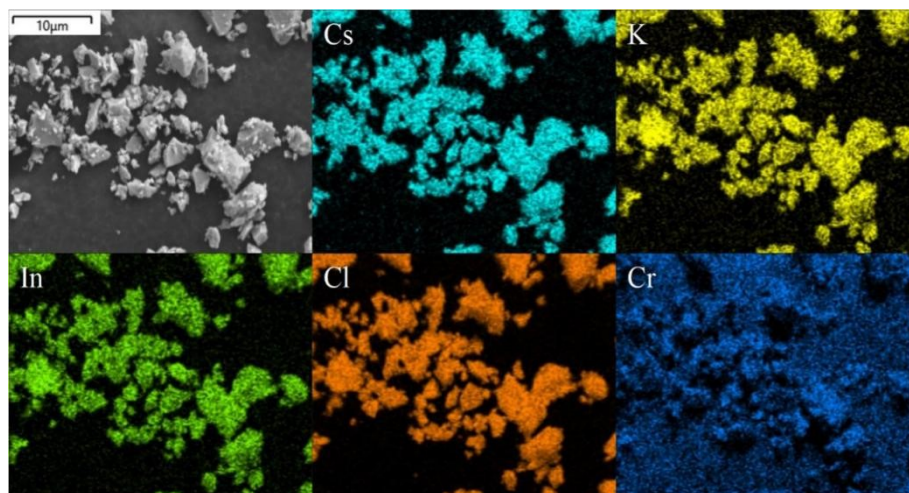

Fig. S4. SEM image and elemental mapping images of  $(\text{Cs}_{0.7}\text{K}_{0.3})_2\text{InCl}_5 \cdot \text{H}_2\text{O} : 0.25\text{Cr}^{3+}$ .



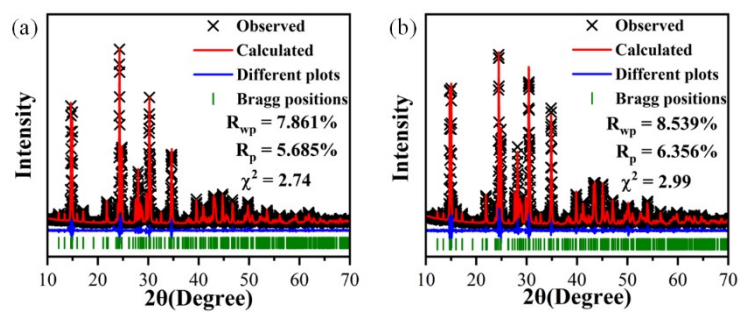

Fig. S5. a,b) XRD Rietveld refinement of  $(\text{Cs}_{0.6}\text{Rb}_{0.4})_2\text{InCl}_5 \cdot \text{H}_2\text{O} : 0.25\text{Cr}^{3+}$  and  $(\text{Cs}_{0.7}\text{K}_{0.3})_2\text{InCl}_5 \cdot \text{H}_2\text{O} : 0.25\text{Cr}^{3+}$ .

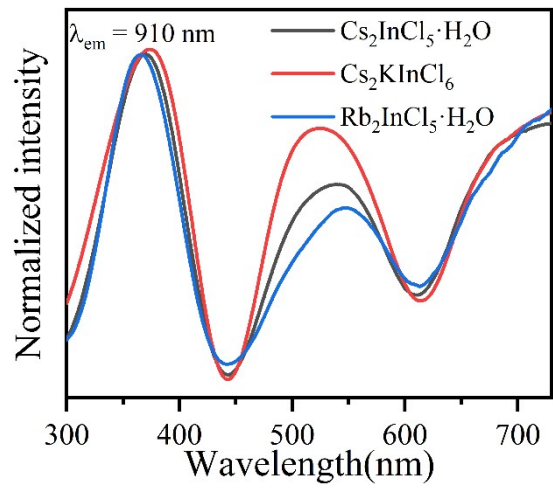

Fig. S6. PLE spectra of  $\text{Cs}_2\text{InCl}_5 \cdot \text{H}_2\text{O} : 0.25\text{Cr}^{3+}$ ,  $\text{Cs}_2\text{KInCl}_6 : 0.25\text{Cr}^{3+}$ ,  $\text{Rb}_2\text{InCl}_5 \cdot \text{H}_2\text{O} : 0.25\text{Cr}^{3+}$ .

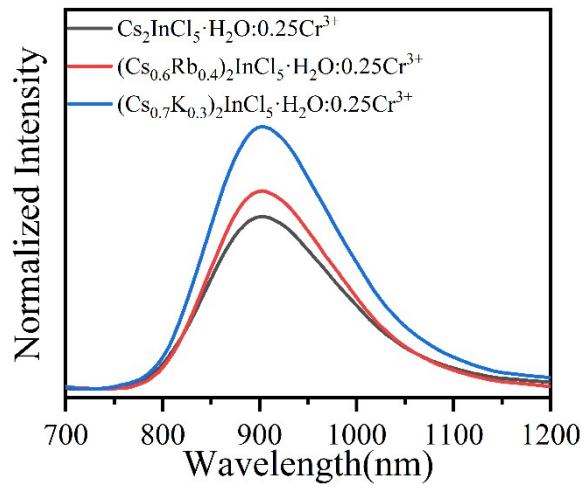

Fig. S7. Normalized PL spectrum of  $\text{Cs}_2\text{InCl}_5 \cdot \text{H}_2\text{O} : 0.25\text{Cr}^{3+}$ ,  $(\text{Cs}_{0.6}\text{Rb}_{0.4})_2\text{InCl}_5 \cdot \text{H}_2\text{O} : 0.25\text{Cr}^{3+}$  and  $(\text{Cs}_{0.7}\text{K}_{0.3})_2\text{InCl}_5 \cdot \text{H}_2\text{O} : 0.25\text{Cr}^{3+}$ .

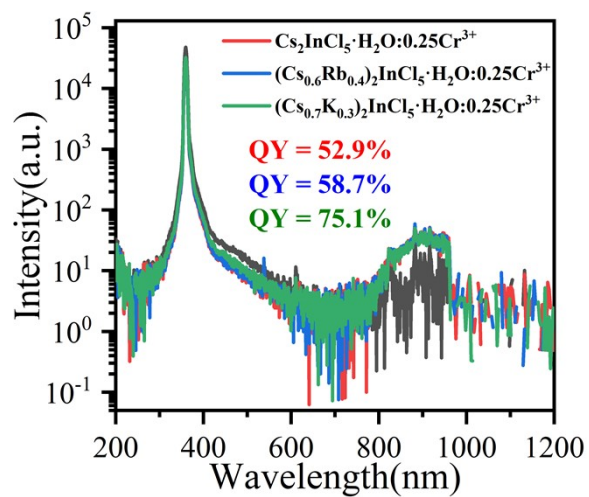

Fig. S8. PLQY of  $\text{Cs}_2\text{InCl}_5 \cdot \text{H}_2\text{O} : 0.25\text{Cr}^{3+}$ ,  $(\text{Cs}_{0.6}\text{Rb}_{0.4})_2\text{InCl}_5 \cdot \text{H}_2\text{O} : 0.25\text{Cr}^{3+}$  and  $(\text{Cs}_{0.7}\text{K}_{0.3})_2\text{InCl}_5 \cdot \text{H}_2\text{O} : 0.25\text{Cr}^{3+}$  under 360 nm excitation.

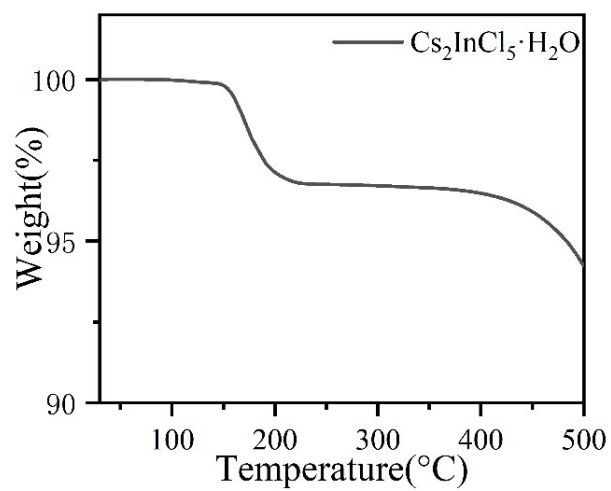

Fig. S9. TG curve of  $\text{Cs}_2\text{InCl}_5 \cdot \text{H}_2\text{O}$ .

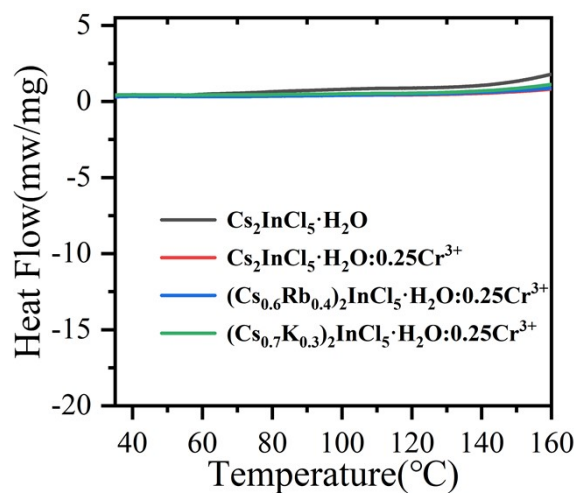

Fig. S10. DSC curves of  $\text{Cs}_2\text{InCl}_5 \cdot \text{H}_2\text{O}$ ,  $\text{Cs}_2\text{InCl}_5 \cdot \text{H}_2\text{O} : 0.25\text{Cr}^{3+}$ ,  $(\text{Cs}_{0.6}\text{Rb}_{0.4})_2\text{InCl}_5 \cdot \text{H}_2\text{O} : 0.25\text{Cr}^{3+}$  and  $(\text{Cs}_{0.7}\text{K}_{0.3})_2\text{InCl}_5 \cdot \text{H}_2\text{O} : 0.25\text{Cr}^{3+}$ .

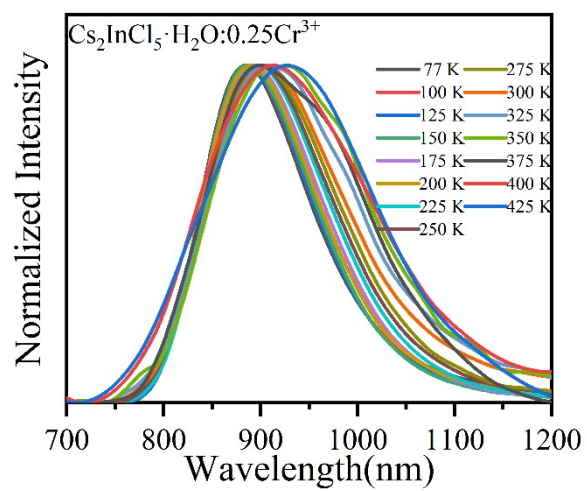

Fig. S11. Normalized temperature-dependent emission spectra of  $\text{Cs}_2\text{InCl}_5 \cdot \text{H}_2\text{O} : 0.25\text{Cr}^{3+}$  from 77 to 425

K.

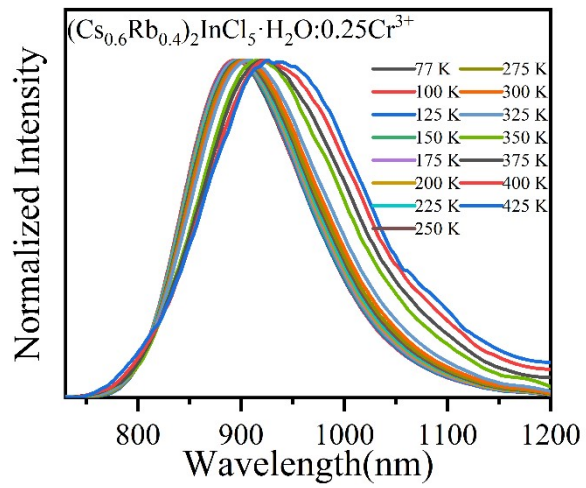

Fig. S12. Normalized temperature-dependent emission spectra of  $(\text{Cs}_{0.6}\text{Rb}_{0.4})_2\text{InCl}_5 \cdot \text{H}_2\text{O} : 0.25\text{Cr}^{3+}$  from 77 to 425 K.



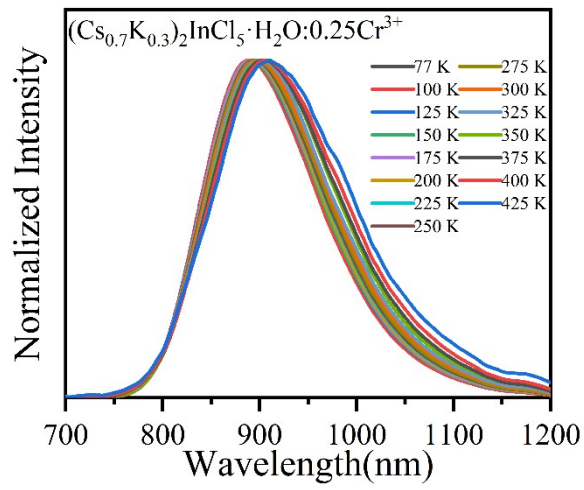

Fig. S13. Normalized temperature-dependent emission spectra of  $(\text{Cs}_{0.7}\text{K}_{0.3})_2\text{InCl}_5 \cdot \text{H}_2\text{O} : 0.25\text{Cr}^{3+}$  from 77 to 425 K.

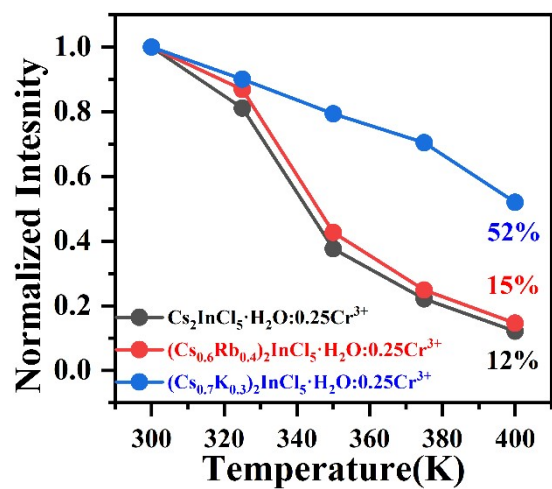

Fig. S14. Temperature-dependent integrated emission intensity of  $\text{Cs}_2\text{InCl}_5 \cdot \text{H}_2\text{O} : 0.25\text{Cr}^{3+}$ ,  $(\text{Cs}_{0.6}\text{Rb}_{0.4})_2\text{InCl}_5 \cdot \text{H}_2\text{O} : 0.25\text{Cr}^{3+}$  and  $(\text{Cs}_{0.7}\text{K}_{0.3})_2\text{InCl}_5 \cdot \text{H}_2\text{O} : 0.25\text{Cr}^{3+}$ .

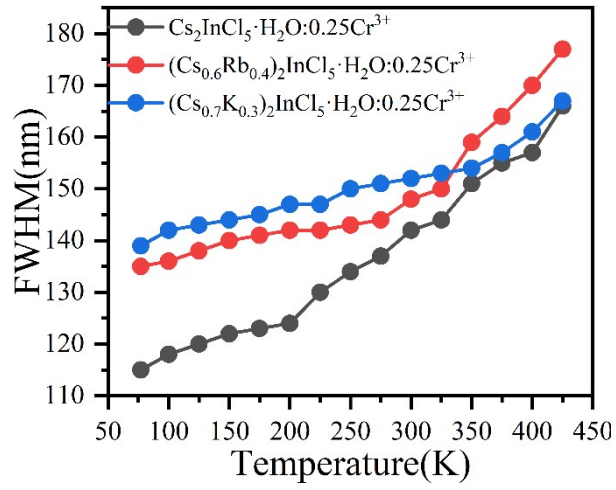

Fig. S15. The dependence of FWHM of the PL spectra for  $\text{Cs}_2\text{InCl}_5 \cdot \text{H}_2\text{O} : 0.25\text{Cr}^{3+}$ ,  $(\text{Cs}_{0.6}\text{Rb}_{0.4})_2\text{InCl}_5 \cdot \text{H}_2\text{O} : 0.25\text{Cr}^{3+}$  and  $(\text{Cs}_{0.7}\text{K}_{0.3})_2\text{InCl}_5 \cdot \text{H}_2\text{O} : 0.25\text{Cr}^{3+}$  on temperature.

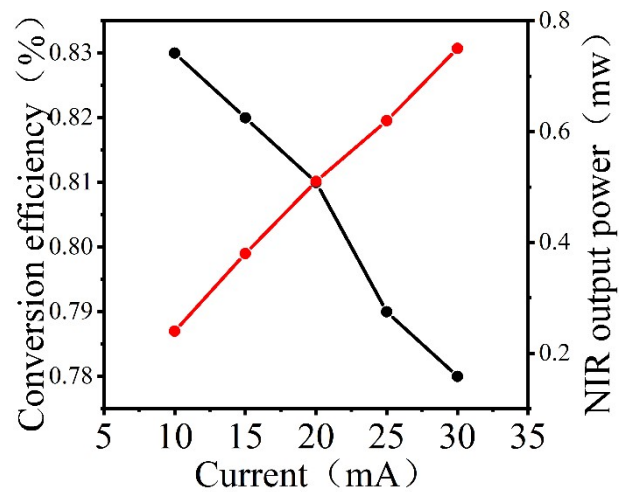

Fig. S16. The output power and photoelectric conversion efficiency of NIR LEDs at different currents.

**Table S1.** Main parameters of processing and refinement results of  $\text{Cs}_2\text{InCl}_5\cdot\text{H}_2\text{O}$  and  $\text{Cs}_2\text{InCl}_5\cdot\text{H}_2\text{O}:0.25\text{Cr}^{3+}$ .

| <b>Compound</b>                   | <b><math>\text{Cs}_2\text{InCl}_5\cdot\text{H}_2\text{O}</math></b> | <b><math>\text{Cs}_2\text{InCl}_5\cdot\text{H}_2\text{O}:\text{Cr}^{3+}</math></b> |
|-----------------------------------|---------------------------------------------------------------------|------------------------------------------------------------------------------------|
| Space group                       | Pnma                                                                | Pnma                                                                               |
| a, Å                              | 14.4167                                                             | 14.4169                                                                            |
| b, Å                              | 10.3843                                                             | 10.3806                                                                            |
| c, Å                              | 7.4117                                                              | 7.4125                                                                             |
| V, Å <sup>3</sup>                 | 1109.5829                                                           | 1109.3217                                                                          |
| $\alpha = \beta = \gamma, ^\circ$ | 90                                                                  | 90                                                                                 |
| Uiso(Cr)                          |                                                                     | 0.006                                                                              |
| Rwp, %                            | 9.144                                                               | 9.681                                                                              |
| Rp, %                             | 6.971                                                               | 7.010                                                                              |

**Table S2.** Main parameters of processing and refinement results of  $(\text{Cs}_{0.6}\text{Rb}_{0.4})_2\text{InCl}_5 \cdot \text{H}_2\text{O} : 0.25\text{Cr}^{3+}$  and  $(\text{Cs}_{0.7}\text{K}_{0.3})_2\text{InCl}_5 \cdot \text{H}_2\text{O} : 0.25\text{Cr}^{3+}$ .

| <b>Compound</b>               | <b><math>(\text{Cs}_{0.6}\text{Rb}_{0.4})_2\text{InCl}_5 \cdot \text{H}_2\text{O} : \text{Cr}^{3+}</math></b> | <b><math>(\text{Cs}_{0.7}\text{K}_{0.3})_2\text{InCl}_5 \cdot \text{H}_2\text{O} : \text{Cr}^{3+}</math></b> |
|-------------------------------|---------------------------------------------------------------------------------------------------------------|--------------------------------------------------------------------------------------------------------------|
| Space group                   | <i>Pnma</i>                                                                                                   | <i>Pnma</i>                                                                                                  |
| a, Å                          | 14.4032                                                                                                       | 14.3061                                                                                                      |
| b, Å                          | 10.3554                                                                                                       | 10.2748                                                                                                      |
| c, Å                          | 7.4070                                                                                                        | 7.3610                                                                                                       |
| <i>V</i> , Å <sup>3</sup>     | 1104.7537                                                                                                     | 1082.0115                                                                                                    |
| $\alpha = \beta = \gamma$ , ° | 90                                                                                                            | 90                                                                                                           |
| <i>U</i> <sub>iso</sub> (Cr)  | 0.005                                                                                                         | 0.003                                                                                                        |
| <i>R</i> <sub>wp</sub> , %    | 7.861                                                                                                         | 8.539                                                                                                        |
| <i>R</i> <sub>p</sub> , %     | 5.685                                                                                                         | 6.356                                                                                                        |
